# Supplementary material for: Nuclear cGAS restricts L1 retrotransposition by promoting TRIM41-mediated ORF2p ubiquitination and degradation
Source: PubMed Central journal article supplement (PMC10716122; doi:10.1038/s41467-023-43001-y), 2023-12-12
Supplement: 41467_2023_43001_MOESM1_ESM.pdf [file 41467_2023_43001_MOESM1_ESM.pdf]

## Supplementary Information

### **Nuclear cGAS restricts L1 retrotransposition by promoting TRIM41-mediated ORF2p ubiquitination and degradation**

Zhengyi Zhen, Yu Chen, Haiyan Wang, Huanyin Tang, Haiping Zhang, Haipeng Liu, Ying Jiang, Zhiyong Mao\*

These authors contributed equally: Zhengyi Zhen, Yu Chen.

\*Corresponding author. Email: zhiyong\_mao@tongji.edu.cn; Tel: +86-21-65978166; Fax: +86-21-65981041.

This file contains:

- Supplementary Figure 1-7
- Supplementary Table 1-2

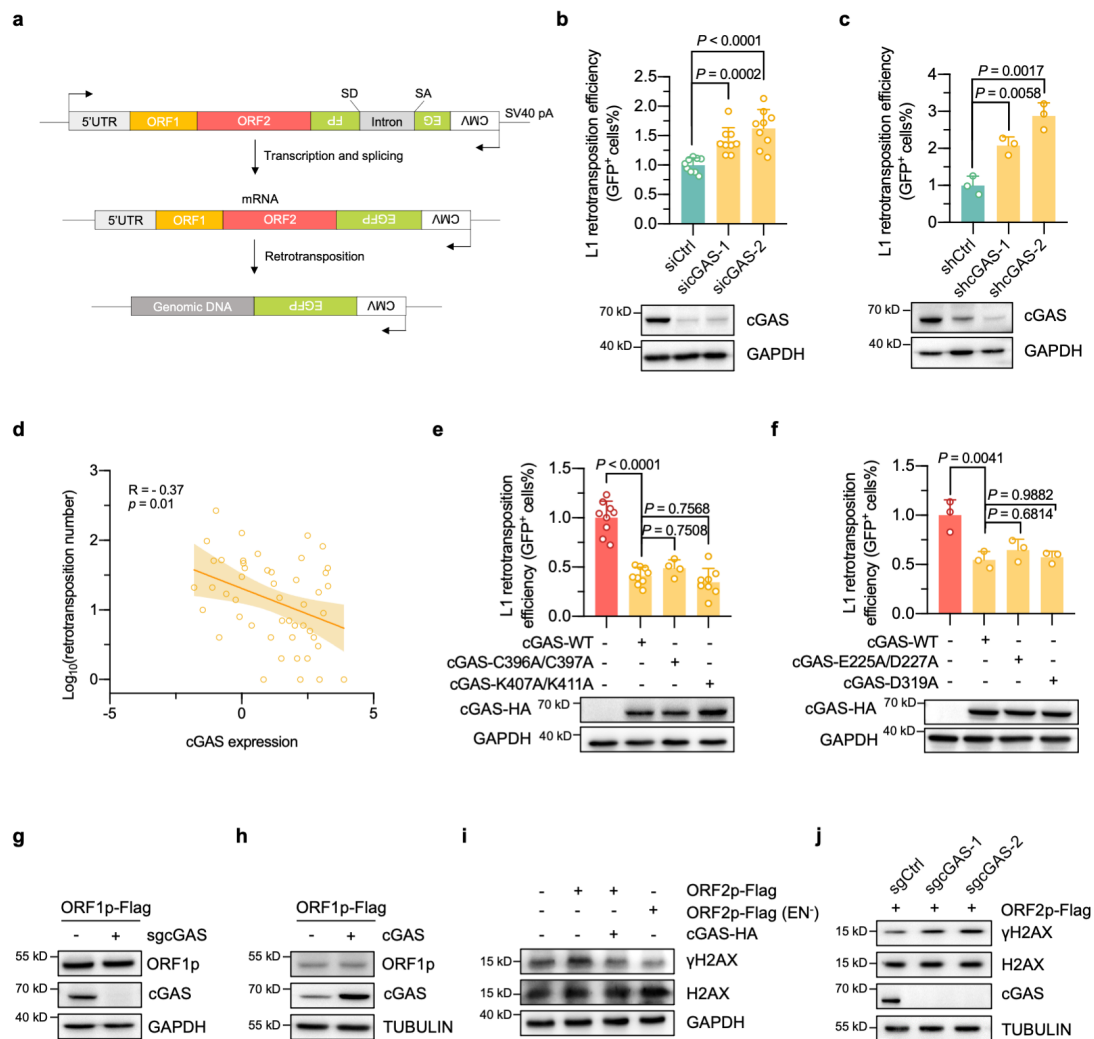

### Supplementary Fig. 1 cGAS inhibits L1 retrotransposition independently on its DNA binding ability and canonical enzyme activity.

**a**, Schematic diagram showing the L1 retrotransposition efficiency reporter pEGFP-LRE3. **b**, Analysis of L1 retrotransposition efficiency in cGAS-knockdown HeLa cells. The retrotransposition efficiency is shown in the top, and the expression of cGAS analyzed by Western blot is shown in the bottom.  $n = 9$  independent experiments. **c**, Analysis of L1 retrotransposition efficiency in HeLa cells with chromosome-integrated shRNA against cGAS.  $n = 3$  independent experiments. **d**, Analysis of the correlation between cGAS mRNA levels and L1 retrotransposition events in lung squamous cell carcinoma (SCC). **e**, Comparison of the effect of overexpression of WT cGAS and its DNA-binding mutants (C396A/C397A and K407A/K411A) on L1 retrotransposition efficiency in HeLa cells.  $n =$  at least 4 independent experiments. **f**, Comparison of the effect of overexpression of WT cGAS and its enzyme-dead mutants (E225A/D227A and D319A) on L1 retrotransposition efficiency in HeLa cells.  $n = 3$  independent experiments. **g**, The effect of cGAS knockout on ORF1p protein levels in HeLa cells as determined by Western blotting. **h**, Analysis of the effect of cGAS overexpression on ORF1p protein levels in HeLa cells. **i**, Analysis of the influence of cGAS overexpression on the level of  $\gamma$ H2AX induced by ORF2p endonuclease. HEK293T cells were transfected with a vector encoding ORF2p-Flag WT or EN mutant and/or cGAS-HA. Whole-cell lysates were prepared for Western blot analysis using an antibody against  $\gamma$ H2AX. **j**, Analysis of the influence of cGAS knockout on the level of  $\gamma$ H2AX induced by ORF2p in cGAS-knockout cells. Data are presented as mean values  $\pm$  s.d. for **b**, **c**, **e**, **f**. Student's *t* test for **b**, **c**, **e** and **f**. All experiments were repeated at least three times.

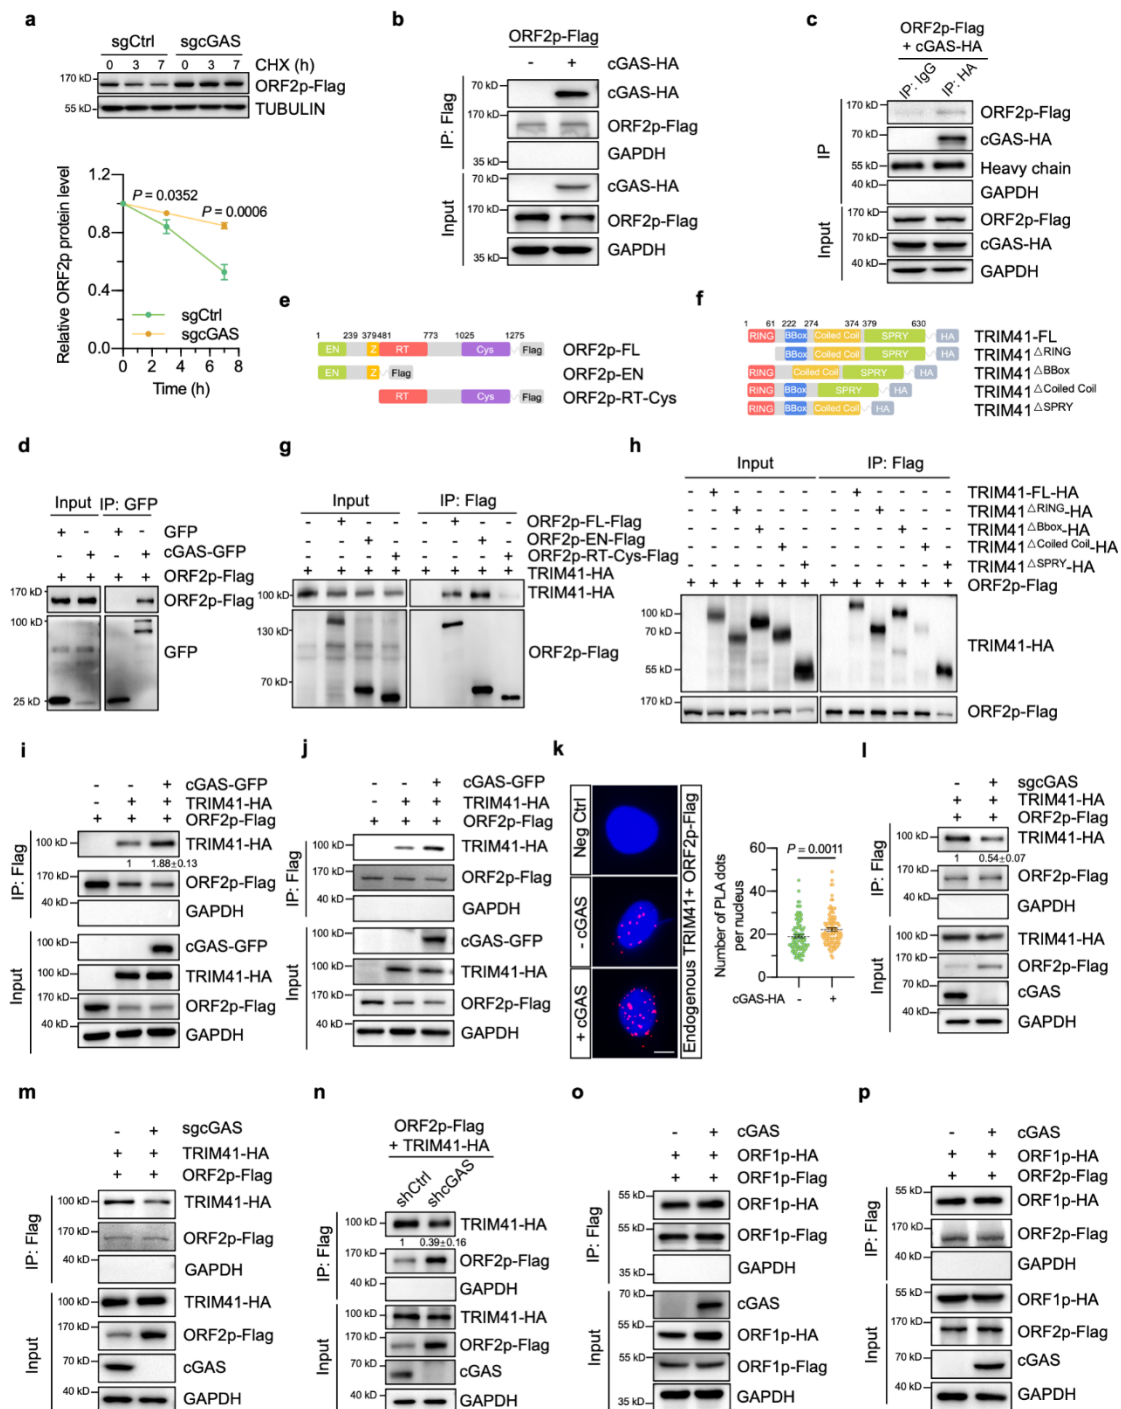

**Supplementary Fig. 2 cGAS interacts with ORF2p, and promotes the interaction between TRIM41 and ORF2p.**

**a**, Analysis of ORF2p protein levels in cGAS-knockout and control cells treated with CHX. Data are presented as mean values  $\pm$  s.d. **b**, **c**, Reciprocal co-IP analysis of the interaction between cGAS and ORF2p in HEK293T cells. Cells were transfected with the indicated plasmids and harvested for use in co-IP experiments with beads coupled with antibodies against Flag or HA 24 h post-transfection. **d**, Analysis of the interaction between cGAS and ORF2p *in vitro* with purified proteins. **e**, Schematic representation of ORF2p truncated mutants used in this study. **f**, Schematic representation of TRIM41 truncated mutants used in this study. **g**, Identification of the domains of ORF2p mediating its interaction with TRIM41 by co-IP in HEK293T cells. **h**, Identification of the domains of TRIM41 mediating its interaction with ORF2p in HEK293T cells as determined by co-IP. **i**, **j**, Analysis of the effect of cGAS overexpression on the TRIM41-ORF2p interaction by using both the HRP-conjugated antibody and fluorescent antibody. **k**, Analysis of the effect of cGAS overexpression on the TRIM41-ORF2p interaction in HeLa cells using PLA assay (scale bar: 10  $\mu$ m).  $n > 50$  cells per group. Data are presented as mean values  $\pm$  s.e.m.. **l**, **m**, Analysis of the effect of cGAS knockout on the TRIM41-ORF2p interaction by using the HRP-conjugated antibody and fluorescent antibody. **n**, Analysis of the effect of cGAS knockdown on the TRIM41-ORF2p interaction. **o**, The effect of cGAS overexpression on ORF1p trimerization analyzed by co-IP and Western blotting. **p**, Analysis of the effect of cGAS overexpression on the ORF1p-ORF2p interaction. Student's t test for **a**, and the Mann-Whitney U test for **k**. All the Inputs and IPs were from the same experiments. All experiments were repeated at least three times.



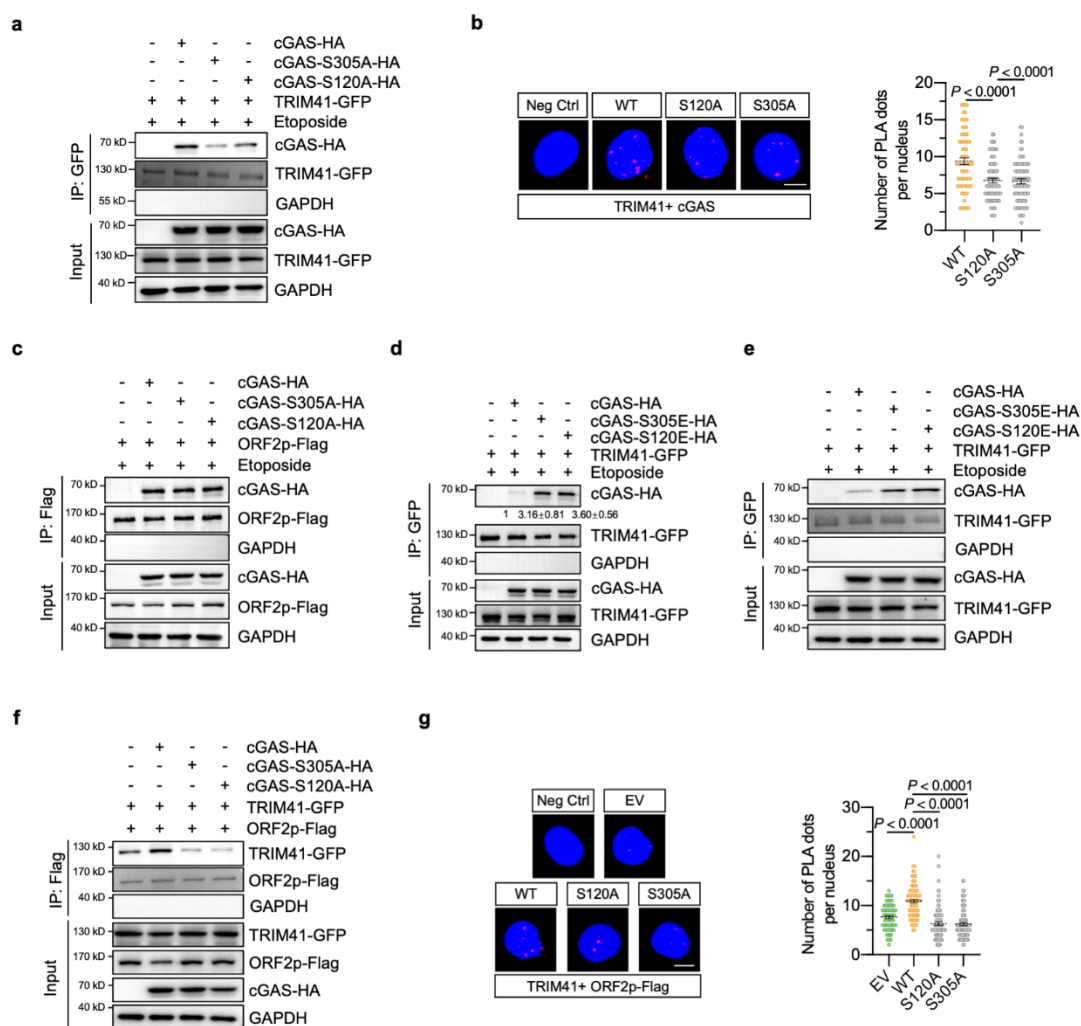

**Supplementary Fig. 4** CHK2 phosphorylates cGAS at S120/S305 residues to enhance the association between cGAS-TRIM41 and TRIM41-ORF2p.

**a**, Comparison of the interaction between TRIM41 and cGAS or its mutants after DNA was damaged using the fluorescent antibody. Cells were transfected with the indicated plasmids and treated with 100  $\mu\text{g}/\text{mL}$  etoposide for 4 h before being harvested at 24 h post-transfection. **b**, Comparison of the interaction between TRIM41 and cGAS or its mutants after DNA was damaged by PLA assay (scale bar: 10  $\mu\text{m}$ ).  $n > 50$  cells per group. Data are presented as mean values  $\pm$  s.e.m. **c**, Comparison of the interaction between ORF2p and cGAS or its mutants after DNA was damaged. **d**, **e**, Comparison of the interaction between TRIM41 and cGAS or its mutants after DNA was damaged, by using both the HRP-conjugated antibody and fluorescent antibody. **f**, Analysis of the effect of overexpressing cGAS or its mutants on the TRIM41-ORF2p interaction in HEK293T cells by using the fluorescent antibody. **g**, Analysis of the effect of overexpressing cGAS or its mutants on the TRIM41-ORF2p interaction in HeLa cells by using PLA assay (scale bar: 10  $\mu\text{m}$ ).  $n > 50$  cells per group. Data are presented as mean values  $\pm$  s.e.m. Mann-Whitney U test for **b** and **g**. All the Inputs and IPs were from the same experiments. All experiments were repeated at least three times.



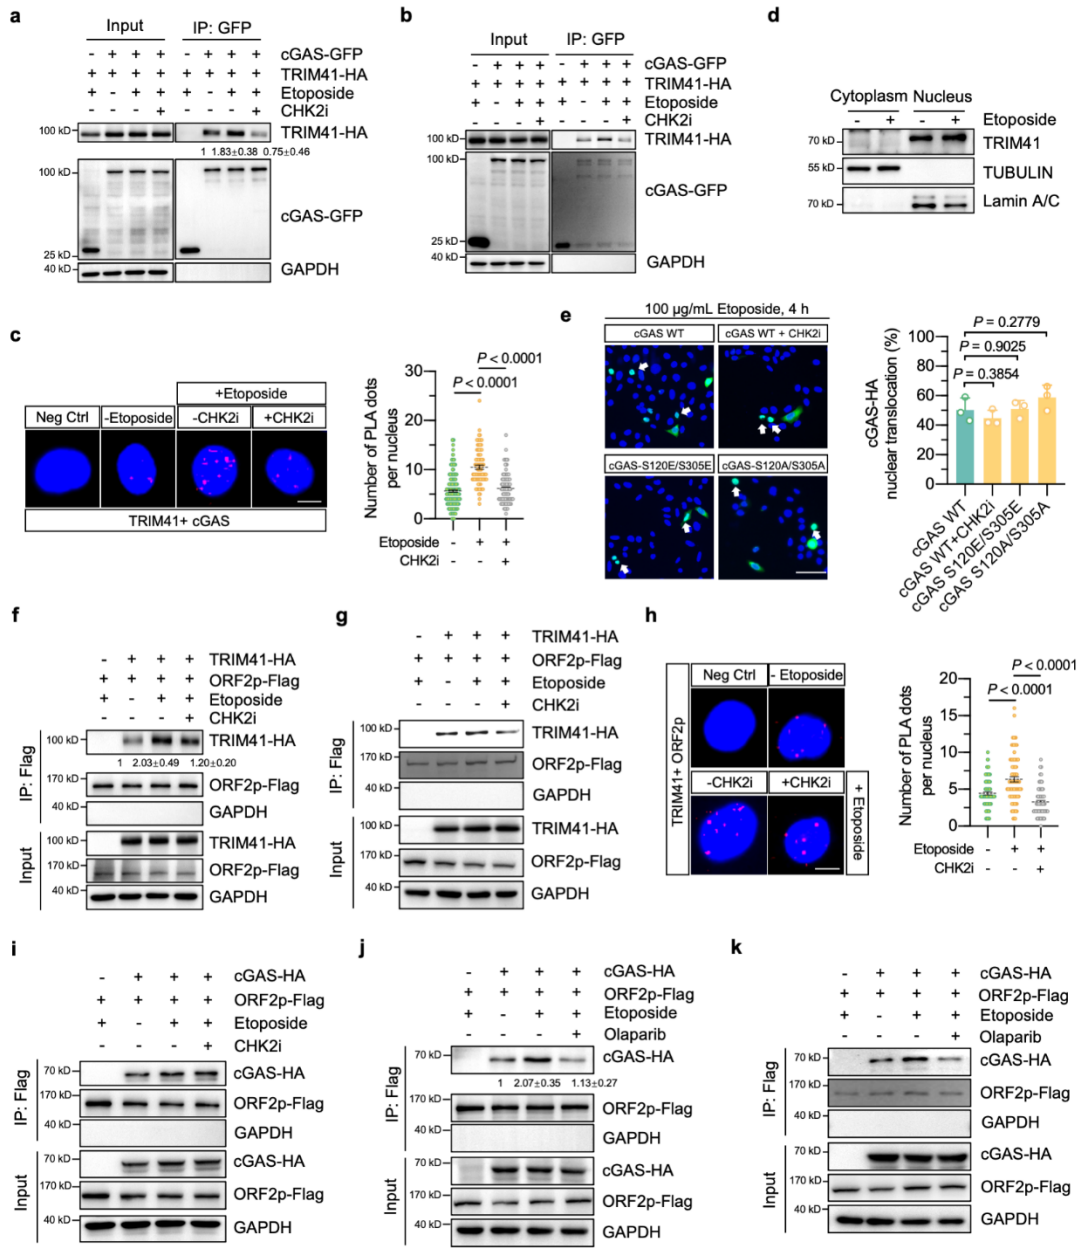

**Supplementary Fig. 5** CHK2 mediates the enhanced association between cGAS-TRIM41 and TRIM41-ORF2p upon the occurrence of DNA damage.

**a, b**, Analysis of the effect of a CHK2 inhibitor on the interaction between cGAS and TRIM41 after DNA was damaged. Cells were treated with 10 µM CHK2 inhibitor for 6 h, followed by treatment with 100 µg/mL etoposide for 4 h before being harvested for use in co-IP and Western blot analysis by using both the HRP-conjugated antibody and fluorescent antibody. **c**, Analysis of the effect of a CHK2 inhibitor on cGAS-TRIM41 interaction using PLA assay after DNA was damaged. (scale bar: 10 µm).  $n > 50$  cells per group. **d**, Analysis of the subcellular localization of TRIM41 in HEK293 cells after DNA was damaged. **e**, Analysis of the nuclear localization of cGAS or its mutants after DNA was damaged (scale bar: 100 µm).  $n > 50$  cells examined over 3 independent experiments per group. **f, g**, Analysis of the effect of a CHK2 inhibitor on the interaction between TRIM41 and ORF2p after DNA was damaged, by using both the HRP-conjugated antibody and fluorescent antibody. **h**, Analysis of the effect of a CHK2 inhibitor on the association of TRIM41-ORF2p after DNA was damaged in HeLa cells using PLA assay (scale bar: 10 µm).  $n > 50$  cells per group. **i**, Analysis of the effect of the CHK2 inhibitor on the interaction between cGAS and ORF2p after DNA was damaged. **j, k**, PARPi disrupted the increase in the cGAS-ORF2p interaction after DNA was damaged by using both the HRP-conjugated antibody and fluorescent antibody. Cells were treated with 5 µM olaparib for 6 h post-transfection, and then treated with 100 µg/mL etoposide for 4 h before being harvested. Data are presented as mean values ± s.e.m. for **c** and **h**, and are presented as mean values ± s.d. for **e**. Mann-Whitney U test for **c** and **h**, and Student's t test for **e**. All the Inputs and IPs were from the same experiments. All experiments were repeated at least three times.

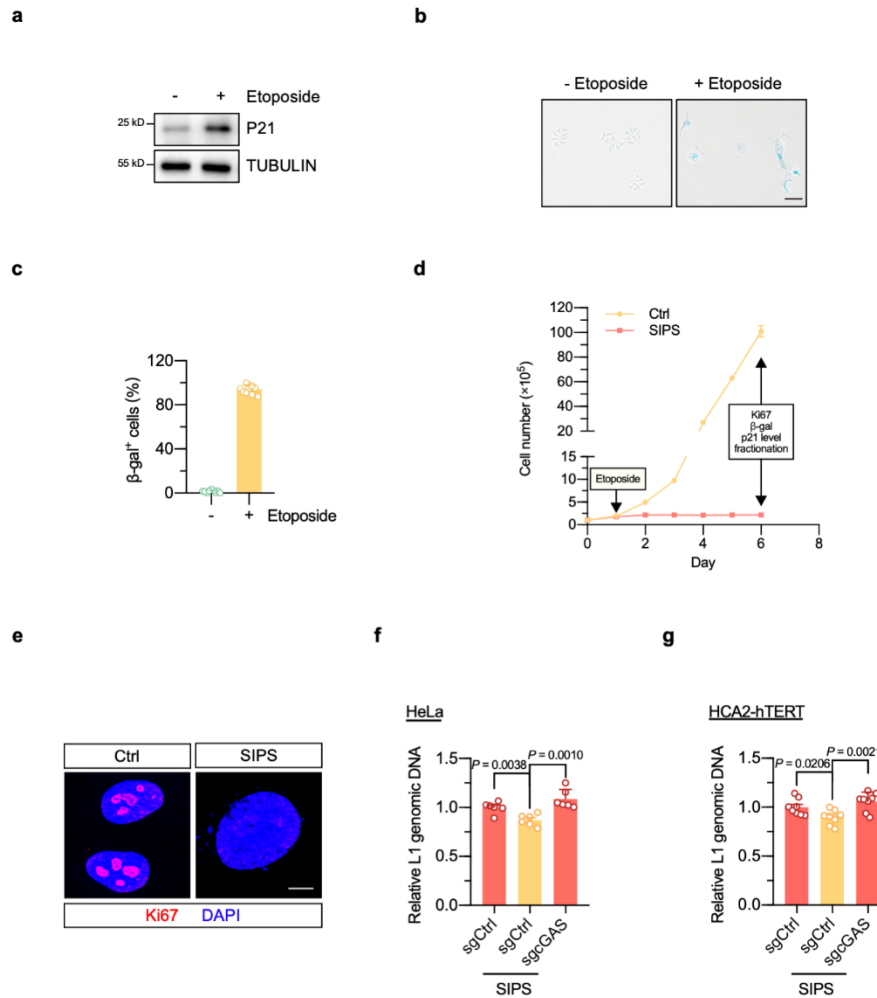

### Supplementary Fig. 6 L1 retrotransposition is repressed in SIPS cells.

**a**, Analysis of the p21 protein level, a well-documented senescence marker, in HeLa cells treated with or without etoposide. **b**, **c**, SA-β-gal staining of HeLa cells treated with or without etoposide. Representative images are shown in **b** (scale bar: 100 μm), and the percentage of SA-β-gal-positive cells is shown in **c**. **d**, The growth curve of HeLa cells treated with or without etoposide. HeLa cells ( $1 \times 10^5$ ) were seeded on Day 0 and treated with etoposide on Day 1. Cells were counted every 24 h from day 1 to 6. Data are presented as mean values  $\pm$  s.d. **e**, Ki67 staining of HeLa cells treated with or without etoposide (scale bar: 10 μm). **f**, Analysis of endogenous L1 copy number in control or cGAS-knockout senescent HeLa cells.  $n = 6$  independent experiments. **g**, Analysis of endogenous L1 copy number in control or cGAS-knockout senescent HCA2-hTERT cells. Data are presented as mean values  $\pm$  s.d..  $n = 8$  independent experiments. Student's t test for **f** and **g**. All experiments were repeated at least three times.

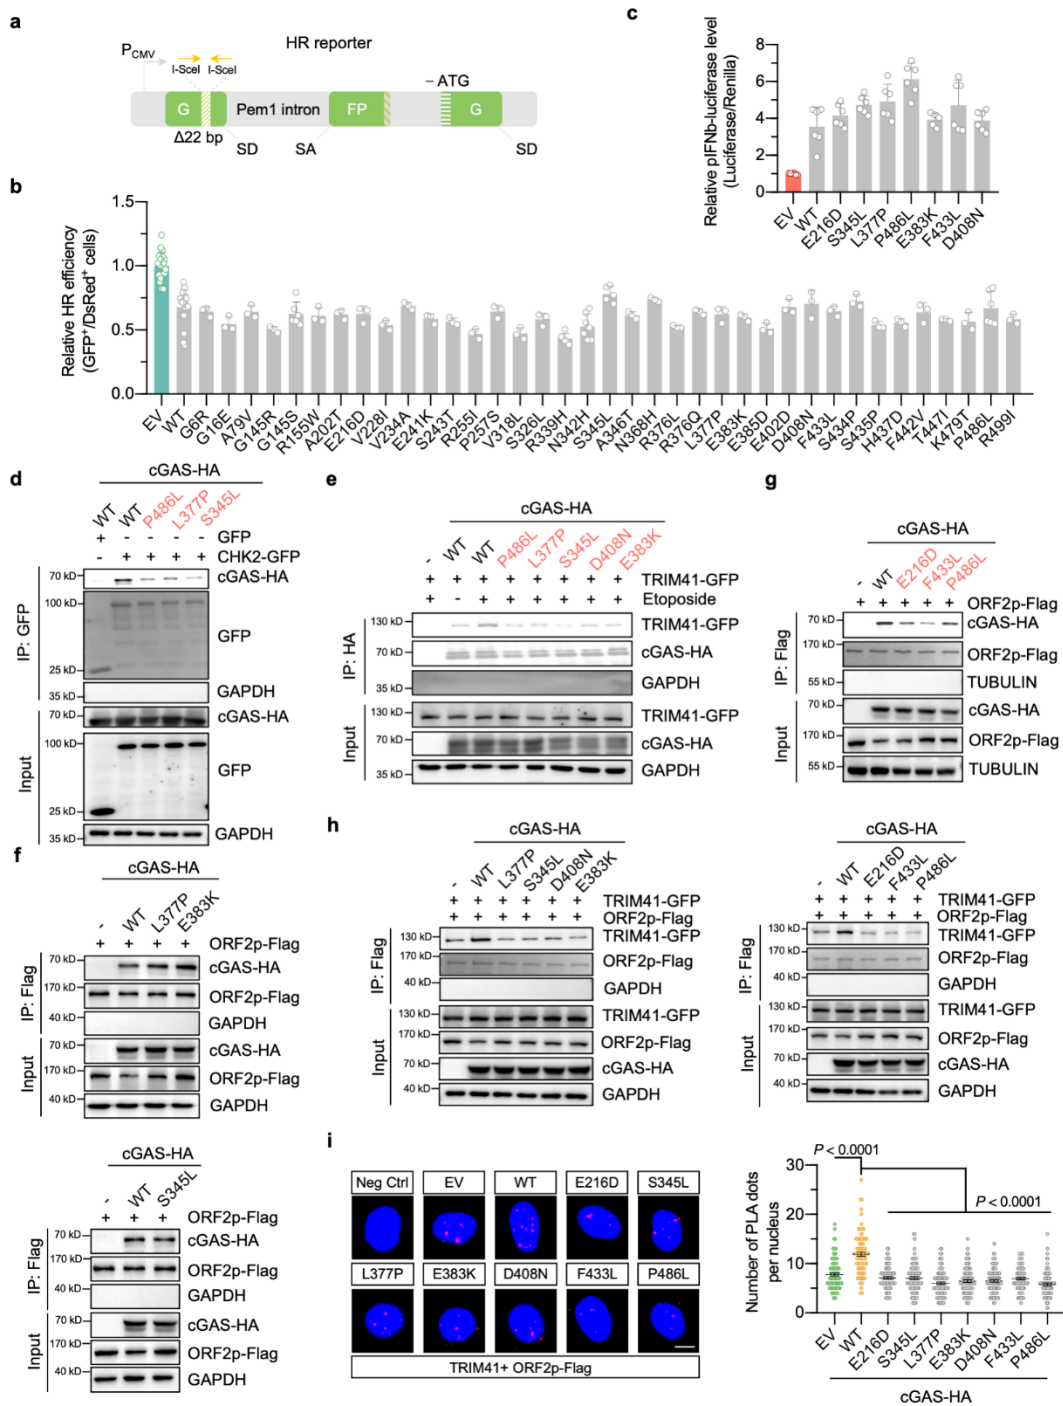

**Supplementary Fig. 7 Cancer-associated cGAS mutations abolish the repressive effect of cGAS on L1 retrotransposition by disrupting the CHK2-cGAS-TRIM41-ORF2p regulatory axis.**

**a**, Schematic diagram showing the HR efficiency reporter. **b**, The effect of cGAS overexpression and its cancer-associated mutants on HR efficiency.  $n =$  at least 3 independent experiments. **c**, The effect of cancer-associated cGAS mutants on IFN promoter activity. A total of  $3 \times 10^5$  HEK293T cells with STING stably integrated into the genome were transfected with  $6 \mu\text{g}$  of pIFN-luciferase vector and  $20 \text{ ng}$  of Renilla luciferase vector and then lysed for use in a luciferase activity analysis 24 h post-transfection.  $n =$  at least 5 independent experiments. **d**, Analysis of the interaction between CHK2 and WT or mutated cGAS using the fluorescent antibody. Cells were transfected with the indicated plasmids and collected for co-IP experiments 24 h post-transfection. **e**, Analysis of the association between TRIM41 and WT or mutated cGAS after DNA was damaged using the fluorescent antibody. The cells were transfected with the indicated plasmids and treated with  $100 \mu\text{g}/\text{mL}$  etoposide for 90 min before being harvested for use in co-IP experiment. **f**, **g**, Analysis of the interaction between ORF2p and WT or mutated cGAS by using both the HRP-conjugated antibody and fluorescent antibody. **h**, Analysis of the effect of overexpressing WT or mutated cGAS on the TRIM41-ORF2p interaction using the fluorescent antibody. **i**, Analysis of the effect of overexpressing WT or mutated cGAS on the TRIM41-ORF2p interaction using the PLA assay (scale bar:  $10 \mu\text{m}$ ).  $n > 50$  cells per group. Data are presented as mean values  $\pm$  s.e.m.. Mann-Whitney U test for **i**. All the Inputs and IPs were from the same experiments. All experiments were repeated at least three times.



## Supplementary Tables

**Supplementary Table 1. The qPCR primers used in this study.**

| <b>Category</b>            | <b>Sequences</b>                                   | <b>Application</b>                                      |
|----------------------------|----------------------------------------------------|---------------------------------------------------------|
| qL1-F<br>qL1-R             | CAAACACCGCATATTCTCACTCA<br>CTTCCTGTGTCCATGTGATCTCA | RT-qPCR for analyzing L1<br>mRNA level                  |
| qGAPDH-F<br>qGAPDH-R       | ATGACATCAAGAAGGTGGTG<br>CATACCAGGAAATGAGCTTG       | Internal control for RT-qPCR                            |
| ghL1-ORF2-F<br>ghL1-ORF2-R | TGCGGAGAAATAGGAACACTTTT<br>TGAGGAATCGCCACACTGACT   | RT-qPCR for analyzing L1<br>copy number in human cells  |
| gh5S-F<br>gh5S-R           | CTCGTCTGATCTCGGAAGCTAAG<br>GCGGTCTCCCATCCAAGTAC    | Internal control for L1 copy<br>number analysis (human) |
| gmL1-ORF2-F<br>gmL1-ORF2-R | CTGGCGAGGATGTGGAGAA<br>CCTGCAATCCCACCAACAAT        | RT-qPCR for analyzing L1<br>copy number in mice         |
| gm5S-F<br>gm5S-R           | ACGGCCATACCACCCTGAA<br>GGTCTCCCATCCAAGTACTAACCA    | Internal control for L1 copy<br>number analysis (mouse) |

**Supplementary Table 2. The siRNA, shRNA and sgRNA sequences used in this study.**

| <b>Category</b> | <b>Sequences</b>      |
|-----------------|-----------------------|
| cGAS siRNA-1    | CGUGAAGAUUUCUGCACCUAA |
| cGAS siRNA-2    | CUUUGAUAACUGCGUGACAUA |
| cGAS shRNA-1    | CGTGAAGATTTCTGCACCTAA |
| cGAS shRNA-2    | GGCTATCCTTCTCTCACAT   |
| cGAS sgRNA-1    | GGCCGCCCGTCCGCGCAACT  |
| cGAS sgRNA-2    | ACACTCGTGCATATTACTTT  |
| TRIM41 sgRNA    | GATTACTTCACGGACCCCG   |
| CHK2 shRNA      | GCCTTAAGACACCCGTGGC   |
